# Supplementary material for: Cross-Canada Variability in Blood Donor SARS-CoV-2 Seroprevalence by Social Determinants of Health
Source: PubMed Central journal article supplement (PMC9927354; doi:10.1128/spectrum.03356-22), 2023-01-10
Supplement: spectrum.03356-22-s0001.pdf [file spectrum.03356-22-s0001.pdf]

**Supplemental Table 1** Number and percentage of donors and donations by demographic groups

|                             | <b>Donors (n=118,998)</b> |          | <b>Donations (n=165,236)</b> |          |
|-----------------------------|---------------------------|----------|------------------------------|----------|
|                             | <b>n</b>                  | <b>%</b> | <b>n</b>                     | <b>%</b> |
| <b>Sex</b>                  |                           |          |                              |          |
| <i>Female</i>               | 55,838                    | 46.92    | 69,085                       | 41.81    |
| <i>Male</i>                 | 63,160                    | 53.08    | 96,151                       | 58.19    |
| <b>Age Group</b>            |                           |          |                              |          |
| 17-24                       | 13,073                    | 10.99    | 15,499                       | 9.38     |
| 25-39                       | 34,217                    | 28.75    | 44,335                       | 26.83    |
| 40-59                       | 42,006                    | 35.30    | 59,480                       | 36.00    |
| 60+                         | 29,702                    | 24.96    | 45,922                       | 27.79    |
| <b>Province</b>             |                           |          |                              |          |
| BC                          | 21,001                    | 17.65    | 27,571                       | 16.69    |
| Alberta                     | 23,035                    | 19.36    | 34,636                       | 20.96    |
| Saskatchewan                | 6,366                     | 5.35     | 8,885                        | 5.38     |
| Manitoba                    | 6,985                     | 5.87     | 9,450                        | 5.72     |
| Ontario                     | 48,711                    | 40.93    | 66,731                       | 40.39    |
| New Brunswick               | 3,884                     | 3.26     | 5,567                        | 3.37     |
| Nova Scotia                 | 5,489                     | 4.61     | 7,379                        | 4.47     |
| PEI                         | 1,138                     | 0.96     | 1,759                        | 1.06     |
| Newfoundland                | 2,128                     | 1.79     | 2,940                        | 1.78     |
| Missing                     | 216                       | 0.18     | 318                          | 0.19     |
| <b>Region</b>               |                           |          |                              |          |
| BC                          | 21,001                    | 17.65    | 27,571                       | 16.69    |
| Alberta                     | 23,035                    | 19.36    | 34,636                       | 20.96    |
| Prairies                    | 13,351                    | 11.22    | 18,335                       | 11.10    |
| Ontario                     | 48,711                    | 40.93    | 66,731                       | 40.39    |
| Atlantic                    | 12,639                    | 10.62    | 17,645                       | 10.68    |
| Missing                     | 261                       | 0.22     | 318                          | 0.19     |
| <b>Racialization</b>        |                           |          |                              |          |
| Racialized                  | 20,230                    | 17.00    | 25,915                       | 15.68    |
| White                       | 88,348                    | 74.24    | 124,541                      | 75.37    |
| Missing                     | 10,420                    | 8.76     | 14,780                       | 8.94     |
| <b>Social Deprivation</b>   |                           |          |                              |          |
| 1 (least deprived)          | 22,033                    | 18.52    | 30,716                       | 18.59    |
| 2                           | 22,395                    | 18.82    | 31,345                       | 18.97    |
| 3                           | 21,213                    | 17.83    | 29,571                       | 17.90    |
| 4                           | 19,547                    | 16.43    | 27,175                       | 16.45    |
| 5 (most deprived)           | 19,993                    | 16.80    | 27,691                       | 16.76    |
| Missing                     | 13,817                    | 11.61    | 18,738                       | 11.34    |
| <b>Material Deprivation</b> |                           |          |                              |          |
| 1 (least deprived)          | 30,989                    | 26.04    | 44,202                       | 26.75    |
| 2                           | 25,537                    | 21.46    | 35,678                       | 21.59    |
| 3                           | 21,610                    | 18.16    | 29,837                       | 18.06    |
| 4                           | 17,043                    | 14.32    | 23,431                       | 14.18    |
| 5 (most deprived)           | 10,002                    | 8.41     | 13,350                       | 8.08     |
| Missing                     | 13,817                    | 11.61    | 18,738                       | 11.34    |

**Supplemental Table 2** Percentage of positive donations by province

| Province                    | Tested |       | Positive |  |
|-----------------------------|--------|-------|----------|--|
|                             | n      | n     | %        |  |
| <b>BC</b>                   | 27,571 | 1,005 | 3.65     |  |
| <b>Alberta</b>              | 34,636 | 2,389 | 6.90     |  |
| <b>Saskatchewan</b>         | 8,885  | 423   | 4.76     |  |
| <b>Manitoba</b>             | 9,450  | 571   | 6.04     |  |
| <b>Ontario</b>              | 66,731 | 2,453 | 3.68     |  |
| <b>New Brunswick</b>        | 5,567  | 24    | 0.43     |  |
| <b>Nova Scotia</b>          | 7,379  | 45    | 0.61     |  |
| <b>Prince Edward Island</b> | 1,759  | 3     | 0.17     |  |
| <b>Newfoundland</b>         | 2,940  | 14    | 0.48     |  |

**Supplemental Table 3** Regional multivariable odds ratios

| Variables                                         | BC (n=27,571)     |         | Alberta (n=34,636) |         | Prairies (n=18,335) |         | Ontario (n=66,731) |         | Atlantic (n=17,645) |         |
|---------------------------------------------------|-------------------|---------|--------------------|---------|---------------------|---------|--------------------|---------|---------------------|---------|
|                                                   | OR (95% CI)       | p-value | OR (95% CI)        | p-value | OR (95% CI)         | p-value | OR (95% CI)        | p-value | OR (95% CI)         | p-value |
| <b>Male (vs Female)</b>                           | 1.30 (1.12, 1.50) | 0.0005  | 1.15 (1.04, 1.27)  | 0.0061  | 1.23 (1.06, 1.43)   | 0.0069  | 1.17 (1.07, 1.29)  | 0.0009  | 1.04 (0.64, 1.68)   | 0.8875  |
| <b>Age Group (vs 60+)</b>                         |                   |         |                    |         |                     |         |                    |         |                     |         |
| 17-24                                             | 2.40 (1.83, 3.14) | <0.0001 | 3.96 (3.31, 4.73)  | <0.0001 | 4.49 (3.50, 5.77)   | <0.0001 | 2.89 (2.43, 3.42)  | <0.0001 | 2.11 (0.99, 4.49)   | 0.0530  |
| 25-39                                             | 2.19 (1.75, 2.75) | <0.0001 | 2.22 (1.88, 2.62)  | <0.0001 | 2.18 (1.72, 2.77)   | <0.0001 | 2.01 (1.73, 2.34)  | <0.0001 | 0.86 (0.43, 1.73)   | 0.6742  |
| 40-59                                             | 1.72 (1.37, 2.15) | <0.0001 | 1.84 (1.57, 2.17)  | <0.0001 | 1.56 (1.23, 1.97)   | 0.0002  | 1.55 (1.33, 1.80)  | <0.0001 | 1.15 (0.60, 2.18)   | 0.6804  |
| <b>Racialized (vs White)</b>                      | 1.68 (1.43, 1.97) | <0.0001 | 1.07 (0.94, 1.22)  | 0.2978  | 0.99 (0.80, 1.21)   | 0.8962  | 2.06 (1.86, 2.28)  | <0.0001 | 2.66 (1.43, 4.95)   | 0.0020  |
| <b>Material Deprivation (vs 1 Least Deprived)</b> |                   |         |                    |         |                     |         |                    |         |                     |         |
| 2                                                 | 0.96 (0.76, 1.21) | 0.7237  | 1.47 (1.28, 1.70)  | <0.0001 | 1.22 (0.96, 1.56)   | 0.1016  | 1.05 (0.91, 1.22)  | 0.4979  | 0.78 (0.38, 1.62)   | 0.5022  |
| 3                                                 | 0.94 (0.75, 1.19) | 0.6119  | 1.62 (1.39, 1.89)  | <0.0001 | 1.65 (1.30, 2.09)   | <0.0001 | 1.13 (0.98, 1.31)  | 0.0989  | 0.70 (0.32, 1.50)   | 0.3564  |
| 4                                                 | 1.24 (0.98, 1.57) | 0.0673  | 2.44 (2.08, 2.85)  | <0.0001 | 2.17 (1.71, 2.76)   | <0.0001 | 1.55 (1.34, 1.80)  | <0.0001 | 0.71 (0.34, 1.46)   | 0.3506  |
| 5 (Most Deprived)                                 | 1.69 (1.32, 2.16) | <0.0001 | 1.86 (1.46, 2.36)  | <0.0001 | 2.12 (1.54, 2.91)   | <0.0001 | 2.20 (1.89, 2.57)  | <0.0001 | 0.37 (0.14, 0.97)   | 0.0427  |
| <b>Social Deprivation (vs 1 Least Deprived)</b>   |                   |         |                    |         |                     |         |                    |         |                     |         |
| 2                                                 | 0.65 (0.52, 0.81) | 0.0001  | 1.00 (0.85, 1.19)  | 0.9674  | 1.20 (0.94, 1.53)   | 0.1490  | 1.00 (0.87, 1.14)  | 0.9432  | 0.55 (0.19, 1.59)   | 0.2714  |
| 3                                                 | 0.65 (0.52, 0.82) | 0.0002  | 0.93 (0.78, 1.10)  | 0.3760  | 0.87 (0.67, 1.13)   | 0.2998  | 0.77 (0.67, 0.90)  | 0.0006  | 1.85 (0.79, 4.36)   | 0.1591  |
| 4                                                 | 0.66 (0.52, 0.83) | 0.0005  | 1.05 (0.89, 1.24)  | 0.5478  | 0.80 (0.62, 1.03)   | 0.0846  | 0.70 (0.60, 0.81)  | <0.0001 | 1.15 (0.47, 2.81)   | 0.7624  |
| 5 (Most Deprived)                                 | 0.50 (0.40, 0.63) | <0.0001 | 0.93 (0.78, 1.10)  | 0.3875  | 0.82 (0.63, 1.05)   | 0.1204  | 0.67 (0.58, 0.78)  | <0.0001 | 1.66 (0.68, 4.07)   | 0.2688  |

**Supplemental Figure 1** Numbers of samples tested per month

| 2021    |          |        |        |        |        |       |        |           |         |          |          |
|---------|----------|--------|--------|--------|--------|-------|--------|-----------|---------|----------|----------|
| January | February | March  | April  | May    | June   | July  | August | September | October | November | December |
| 34,280  | 34       | 16,949 | 17,027 | 17,042 | 17,003 | 8,465 | 9,246  | 9,446     | 9,653   | 9,124    | 16,967   |

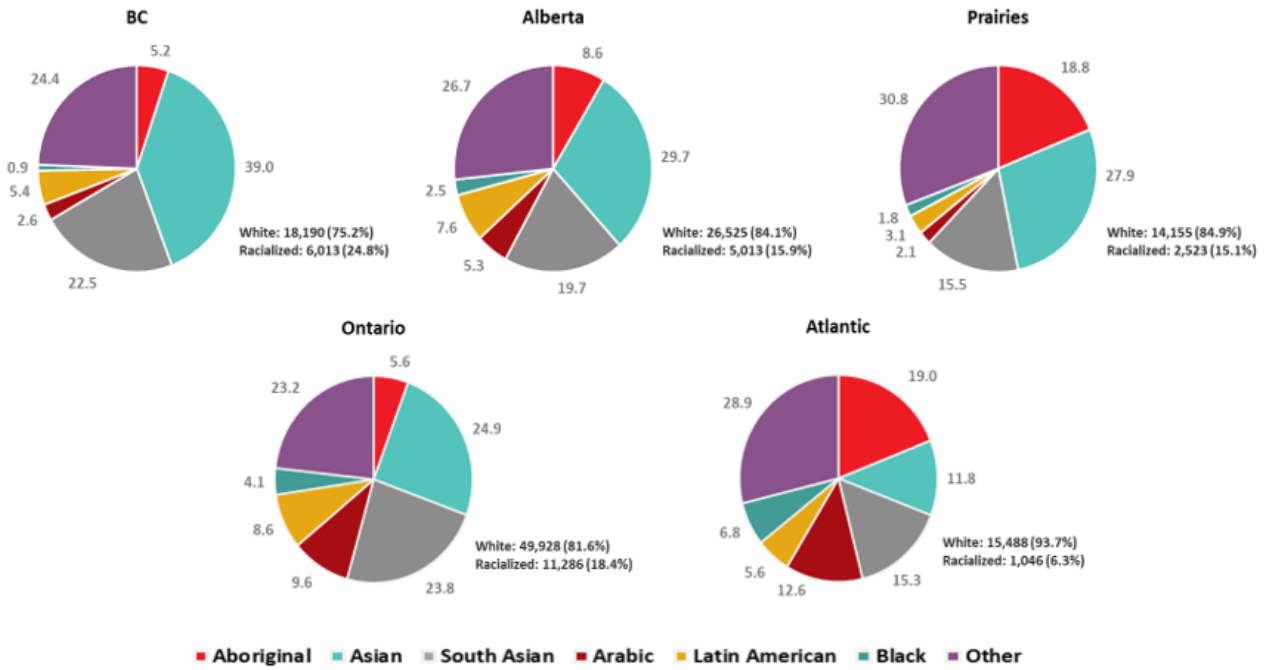

**Supplemental Figure 2** Pie charts of regional racialized donors by self selected ethnicities
